# Supplementary material for: Years of life lost during the Covid-19 pandemic in Sweden considering variation in life expectancy by level of geriatric care
Source: Springer Nature journal article supplement (doi:10.1007/s10654-022-00915-z), 2022-09-20
Supplement: MOESM1 [file 23515900]

Supplemental materials: Years of life lost during the Covid-19 pandemic in Sweden considering variation in life expectancy by level of geriatric care

Marcus Ebeling<sup>1,2</sup> Enrique Acosta<sup>2</sup> Hal Caswell<sup>3</sup> Anna C. Meyer<sup>1</sup> Karin Modig<sup>1</sup>

March 14, 2022

## 1 Multistate model

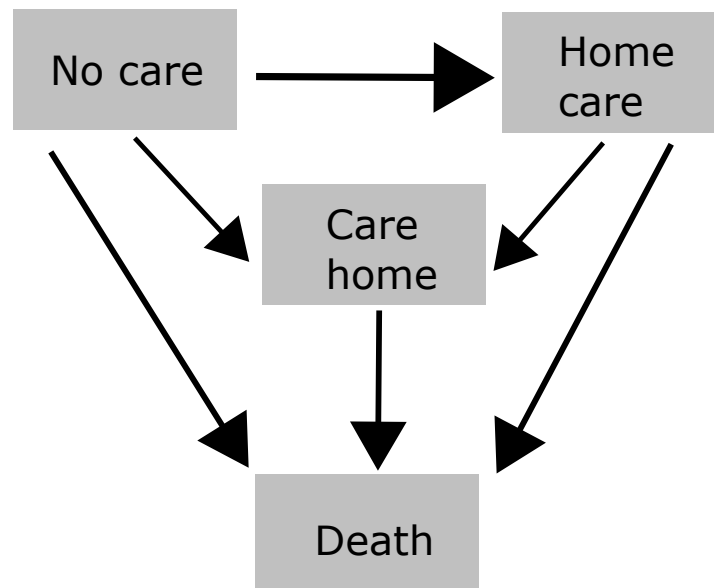

**Figure 1: Specification of the multistate model used to estimate life expectancy by age and care status.**

---

<sup>1</sup> Institute of Environmental Medicine, Karolinska Institutet, Stockholm, Sweden

<sup>2</sup> Max Planck Institute for Demographic Research, Rostock, Germany

<sup>3</sup> University of Amsterdam, Amsterdam, Netherlands

## 2 Transitions probabilities

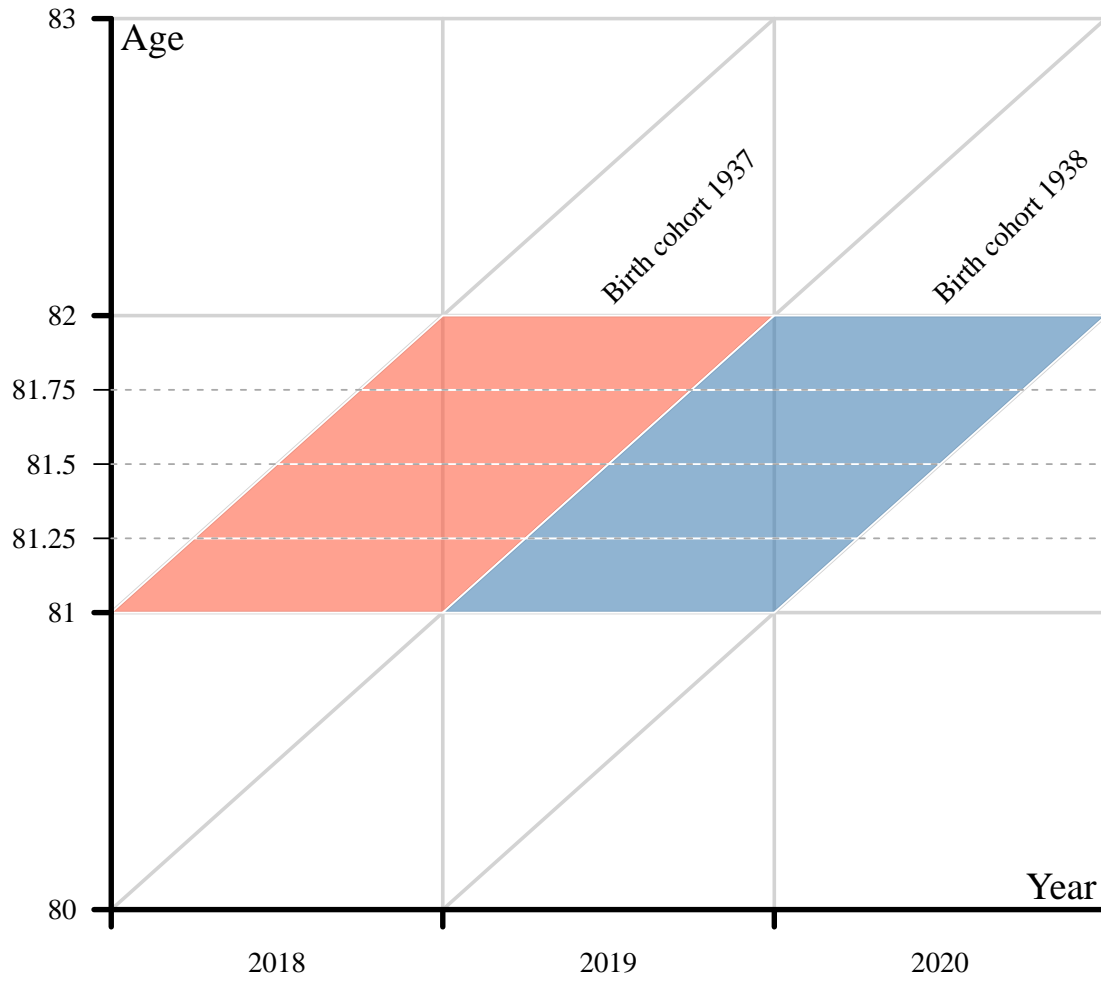

Figure 2: Illustration of the construction of age groups for the calculation of transition probabilities.

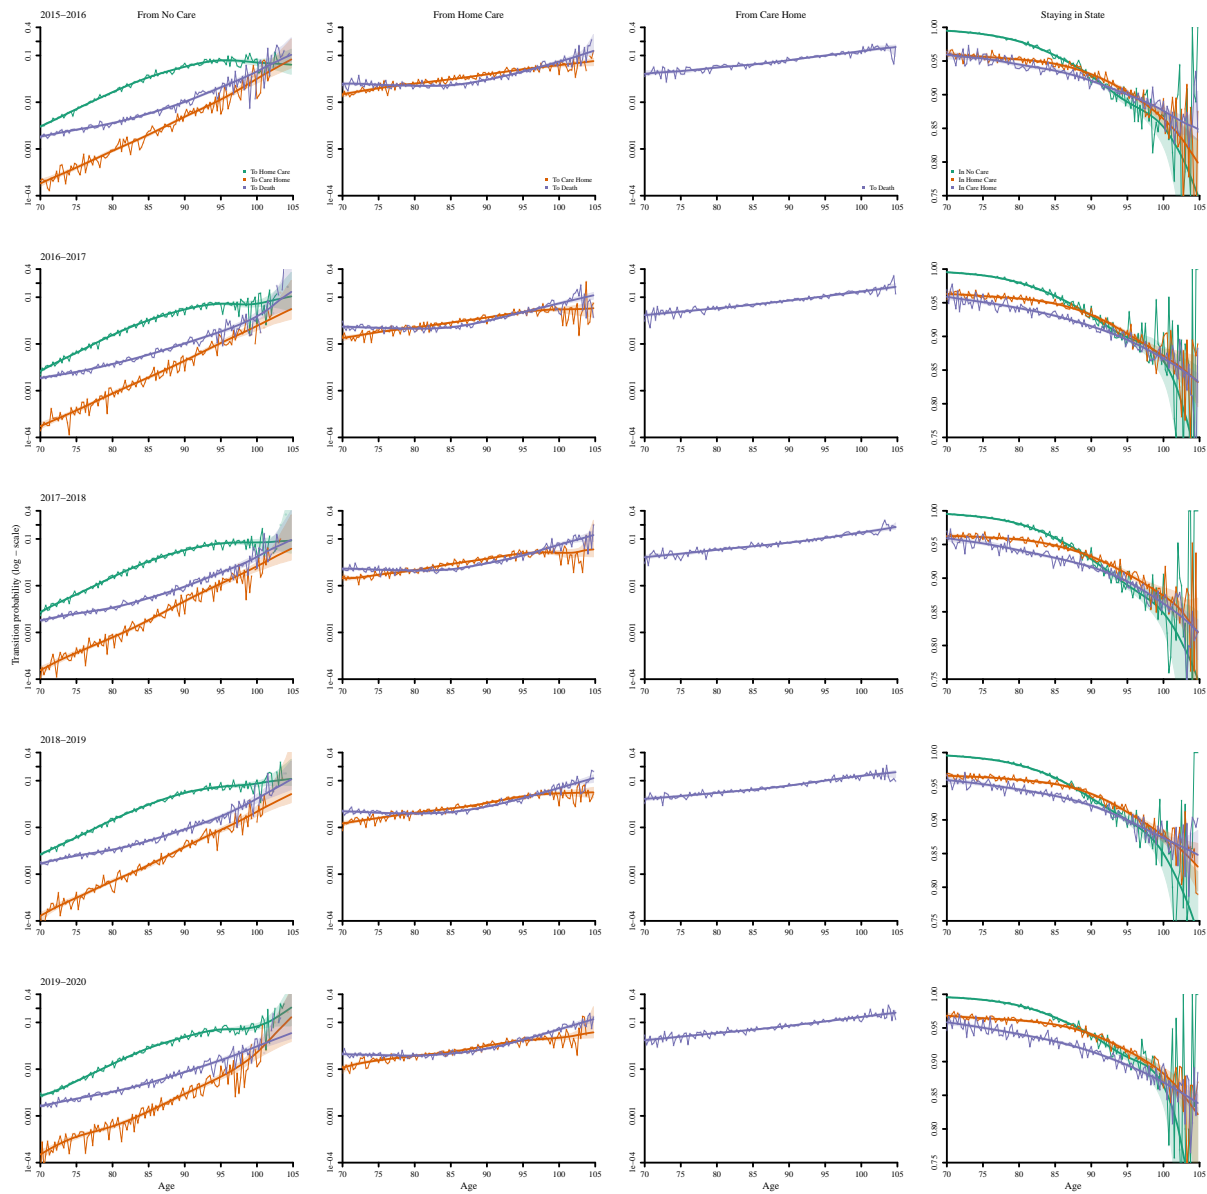

**Figure 3: Observed and smoothed transition probabilities, Women, Sweden.** Transition probabilities for the period 2018-2019 used as input for multistate model.

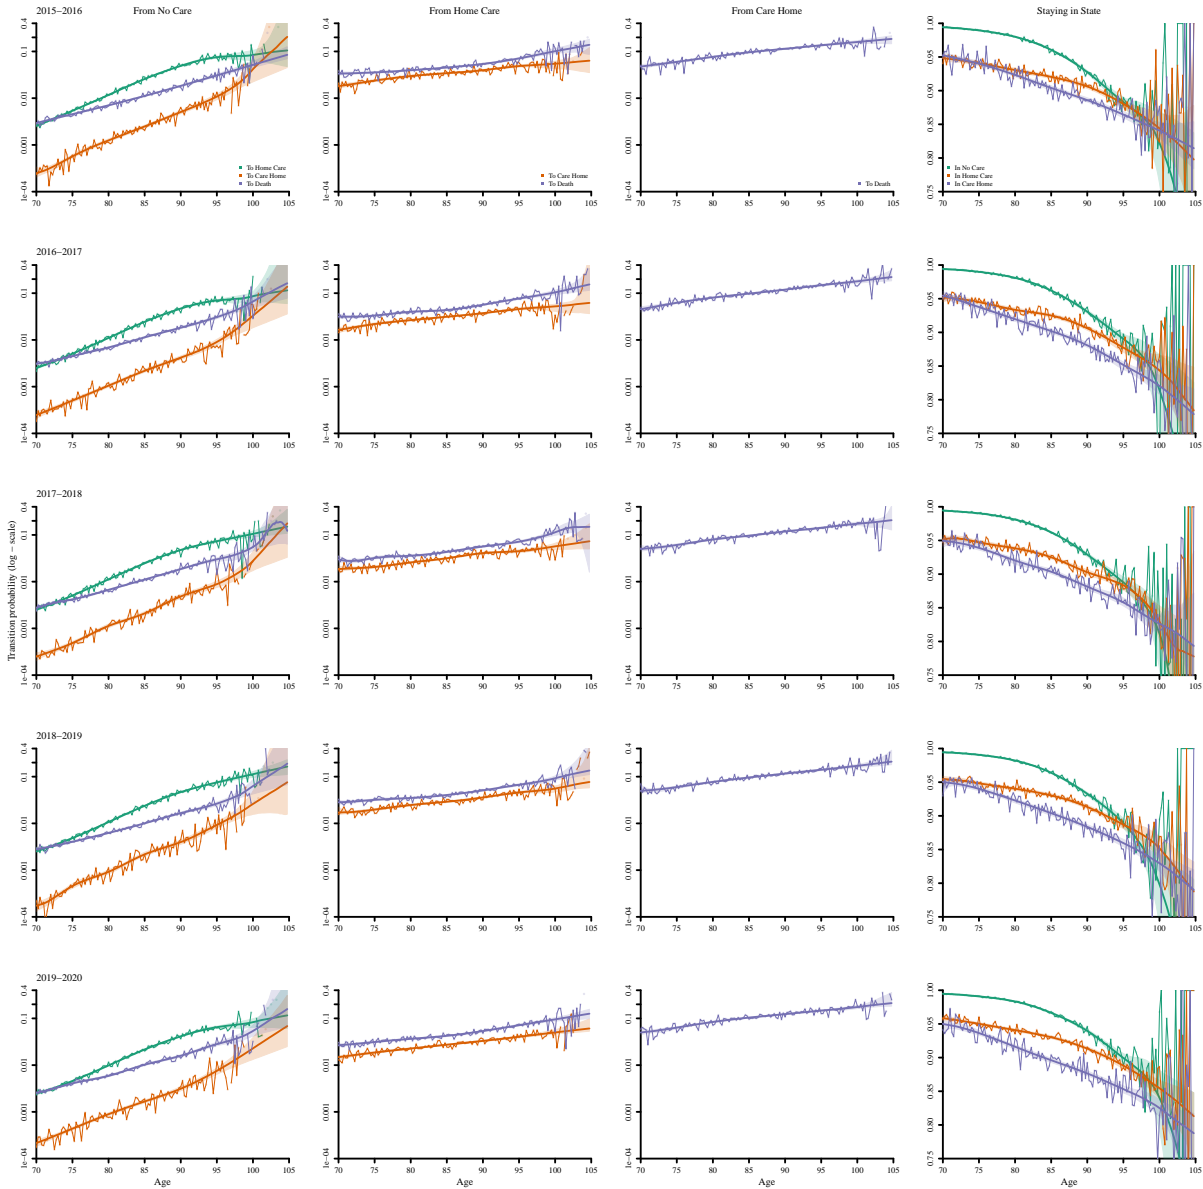

**Figure 4: Observed and smoothed transition probabilities, Men, Sweden.** Transition probabilities for the period 2018-2019 used as input for multistate model.

### 3 Sensitivity checks across alternative ways to calculate life expectancy from multistate model and between observed versus smoothed transition probabilities

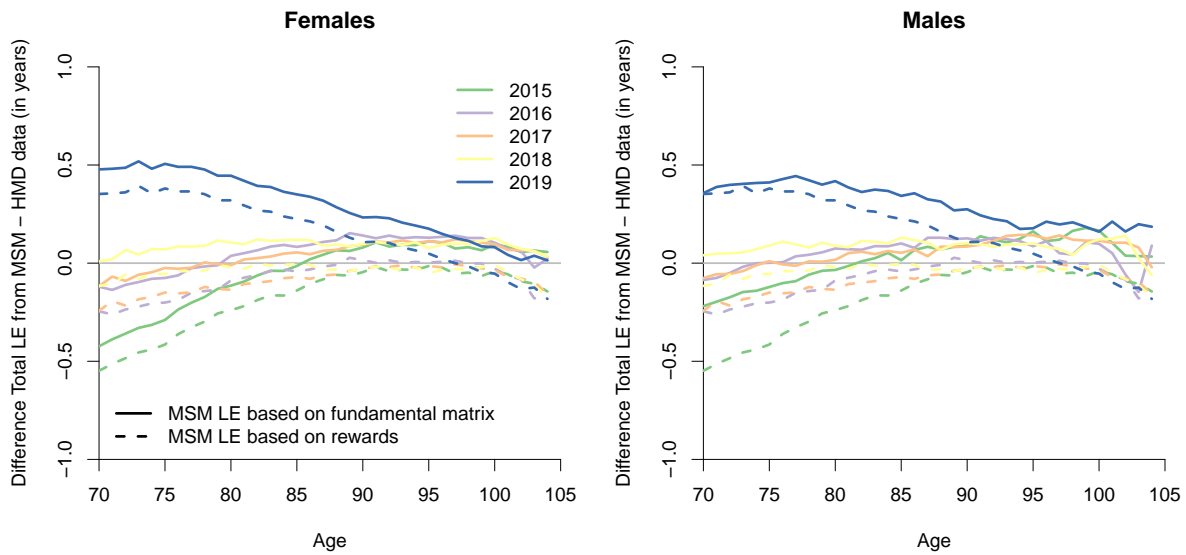

Figure 5: Differences between total life expectancy from multistate model and from life table calculation, Women and Men, Sweden.

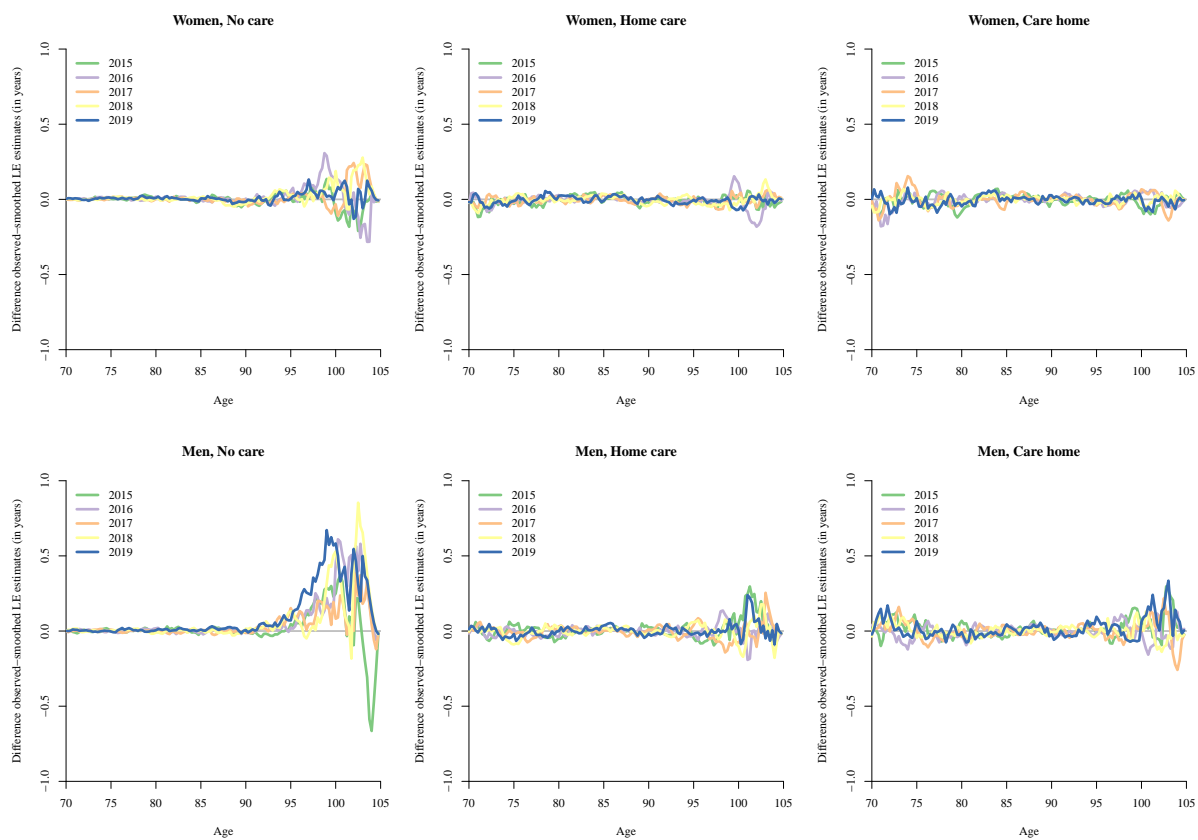

**Figure 6: Differences between care-specific life expectancy based on observed and smoothed transition probabilities, Women and Men, Sweden.**

## 4 Distribution of causes of death

**Table 1: Proportion of deaths by different causes of death on the total number of deaths at ages 70 and above, women, 2019 and 2020, Sweden.**

|                     | Total  |        |        | No care |       |       | Home care |        |        | Care home |        |        |
|---------------------|--------|--------|--------|---------|-------|-------|-----------|--------|--------|-----------|--------|--------|
|                     | 2019   | 2020   | 2020*  | 2019    | 2020  | 2020* | 2019      | 2020   | 2020*  | 2019      | 2020   | 2020*  |
| Total deaths        | 38,678 | 42,698 | 37,629 | 6,824   | 7,183 | 6,704 | 14,123    | 15,432 | 13,809 | 17,731    | 20,083 | 17,116 |
| Covid-19            | –      | 9.69   | –      | –       | 5.60  | –     |           | 8.05   | –      |           | 12.40  | –      |
| Inf./parasitic dis. | 2.53   | 2.49   | 2.83   | 1.99    | 2.03  | 2.18  | 3.01      | 3.05   | 3.41   | 2.35      | 2.23   | 2.61   |
| Col. cancer         | 2.58   | 2.52   | 2.86   | 4.32    | 4.32  | 4.62  | 3.67      | 3.75   | 4.19   | 1.05      | 0.93   | 1.09   |
| Isch. heart dis.    | 9.93   | 8.57   | 9.73   | 11.68   | 10.44 | 11.19 | 10.27     | 9.04   | 10.10  | 8.98      | 7.55   | 8.86   |
| Stroke              | 4.72   | 3.99   | 4.53   | 6.40    | 5.08  | 5.44  | 4.66      | 4.21   | 4.70   | 4.11      | 3.43   | 4.03   |
| Resp. diseases      | 7.33   | 5.90   | 6.70   | 7.05    | 5.74  | 6.15  | 9.18      | 7.75   | 8.66   | 5.98      | 4.54   | 5.33   |
| External causes     | 2.96   | 2.77   | 3.14   | 3.77    | 3.15  | 3.37  | 3.29      | 3.21   | 3.58   | 2.39      | 2.29   | 2.69   |
| All other           | 69.95  | 64.07  | 72.70  | 64.79   | 63.65 | 68.20 | 65.93     | 60.94  | 68.10  | 75.15     | 66.63  | 78.18  |

2020\* - Excess deaths subtracted from total number of deaths

**Table 2: Proportion of deaths by different causes of death on the total number of deaths at ages 70 and above, men, 2019 and 2020, Sweden.**

|                     | Total  |        |        | No care |        |        | Home care |        |        | Care home |        |        |
|---------------------|--------|--------|--------|---------|--------|--------|-----------|--------|--------|-----------|--------|--------|
|                     | 2019   | 2020   | 2020*  | 2019    | 2020   | 2020*  | 2019      | 2020   | 2020*  | 2019      | 2020   | 2020*  |
| Total deaths        | 34,628 | 39,433 | 33,912 | 11,346  | 12,544 | 10,997 | 12,604    | 14,341 | 12,620 | 10,678    | 12,558 | 10,295 |
| Covid-19            | –      | 11.27  | –      | –       | 8.35   | –      | –         | 10.28  | –      | –         | 15.31  | –      |
| Inf./parasitic dis. | 2.67   | 2.57   | 2.99   | 1.75    | 2.11   | 2.41   | 3.07      | 2.71   | 3.07   | 3.17      | 2.87   | 3.50   |
| Col. cancer         | 2.99   | 2.52   | 2.93   | 4.28    | 3.60   | 4.10   | 3.51      | 3.15   | 3.58   | 1.01      | 0.72   | 0.88   |
| Isch. heart dis.    | 13.12  | 11.39  | 13.25  | 16.90   | 15.32  | 17.48  | 12.42     | 10.97  | 12.46  | 9.92      | 7.95   | 9.69   |
| Stroke              | 4.22   | 3.68   | 4.28   | 4.64    | 4.37   | 4.98   | 3.74      | 3.37   | 3.83   | 4.33      | 3.34   | 4.07   |
| Resp. diseases      | 7.55   | 6.12   | 7.12   | 6.76    | 5.26   | 6.00   | 8.87      | 7.13   | 8.11   | 6.83      | 5.81   | 7.09   |
| External causes     | 3.96   | 3.45   | 4.01   | 4.90    | 4.27   | 4.87   | 3.96      | 3.53   | 4.01   | 2.97      | 2.53   | 3.09   |
| All other           | 65.49  | 59.01  | 68.64  | 60.76   | 56.72  | 64.70  | 64.42     | 58.87  | 66.89  | 71.77     | 61.47  | 74.98  |

2020\* - Excess deaths subtracted from total number of deaths
